# Supplementary material for: A diglycolamide-functionalized TREN-based dendrimer with a ‘crab-like’ grip for the complexation of actinides and lanthanides
Source: Royal Society of Chemistry journal article supplement (doi:10.1039/c8dt03051k), 2018-01-01
Supplement: c8dt03051k1.pdf [file c8dt03051k1.pdf]

# A diglycolamide-functionalized TREN-based dendrimer with a ‘crab-like’ grip for the complexation of actinides and lanthanides

Arunasis Bhattacharyya,<sup>1</sup> Andrea Leoncini,<sup>2</sup> Prasanta K. Mohapatra,<sup>1,\*</sup> Parveen K. Verma,<sup>1</sup>  
Avinash S. Kanekar,<sup>1</sup> Ashok K. Yadav,<sup>3</sup> Sambhunath Jha,<sup>3</sup> Dibyendu Bhattacharyya,<sup>3</sup> Richard J.  
M. Egberink,<sup>2</sup> Jurriaan Huskens,<sup>2</sup> and Willem Verboom<sup>2,\*</sup>

<sup>1</sup>Radiochemistry Division, Bhabha Atomic Research Centre, Mumbai-400085, India

<sup>2</sup>Laboratory of Molecular Nanofabrication, MESA+ Institute for Nanotechnology, University of Twente, P.O. Box 217, 7500 AE Enschede, The Netherlands

<sup>3</sup>Atomic & Molecular Physics Division, Bhabha Atomic Research Centre, Mumbai-400085, India

## Electronic Supporting Information

| Contents                      | Page |
|-------------------------------|------|
| 1. Solvent extraction studies | 2    |
| 2. Luminescence studies       | 3    |
| 3. DFT studies                | 5    |

## 1. Solvent extraction studies

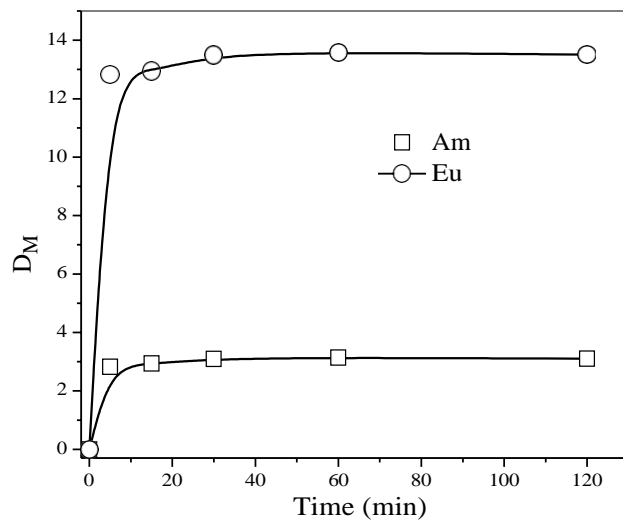

Fig.S1 Effect of equilibration time on the extraction of  $\text{Am}^{3+}$  and  $\text{Eu}^{3+}$ ; Org. phase: 1.0 mM TREN-G1-DGA in 5% iso-decanol/n-dodecane; Aq. phase: 3 M  $\text{HNO}_3$ .

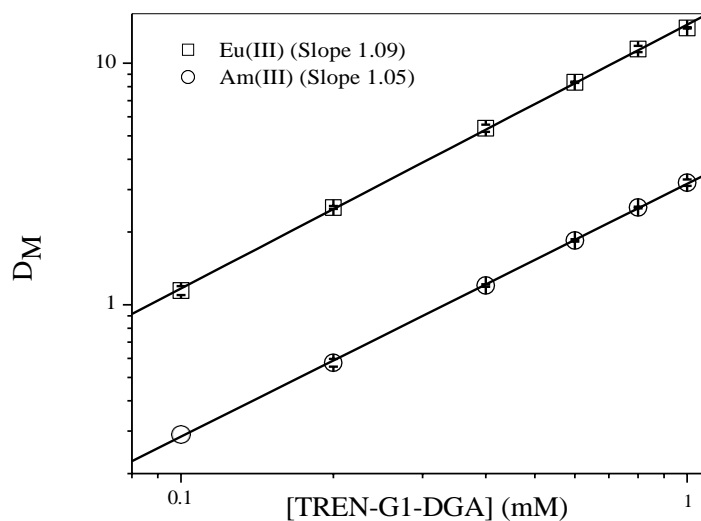

Fig. S2 Effect of the TREN-G1-DGA concentration on the extraction of  $\text{Am}^{3+}$  and  $\text{Eu}^{3+}$ ; Org. phase: TREN-G1-DGA in 5% iso-decanol/n-dodecane; Aq. phase: 3 M  $\text{HNO}_3$ .

Table S1. Separation behavior of Am<sup>3+</sup> and Eu<sup>3+</sup> from nitrate media

| [NaNO <sub>3</sub> ] <sup>a</sup> , M | SF (D <sub>Eu</sub> /D <sub>Am</sub> ) | [HNO <sub>3</sub> ], M | SF (D <sub>Eu</sub> /D <sub>Am</sub> ) |
|---------------------------------------|----------------------------------------|------------------------|----------------------------------------|
| 0.1                                   | 2                                      | 0.5                    | 1.91                                   |
| 0.5                                   | 2.35                                   | 1                      | 2.21                                   |
| 1                                     | 2.29                                   | 3                      | 4.38                                   |
| 3                                     | 2.17                                   | 6                      | 6.11                                   |
| 6                                     | 2.06                                   |                        |                                        |

<sup>a</sup>Also contained 0.01 M HNO<sub>3</sub> to prevent the hydrolysis of the metal ion

## 2. Luminescence studies

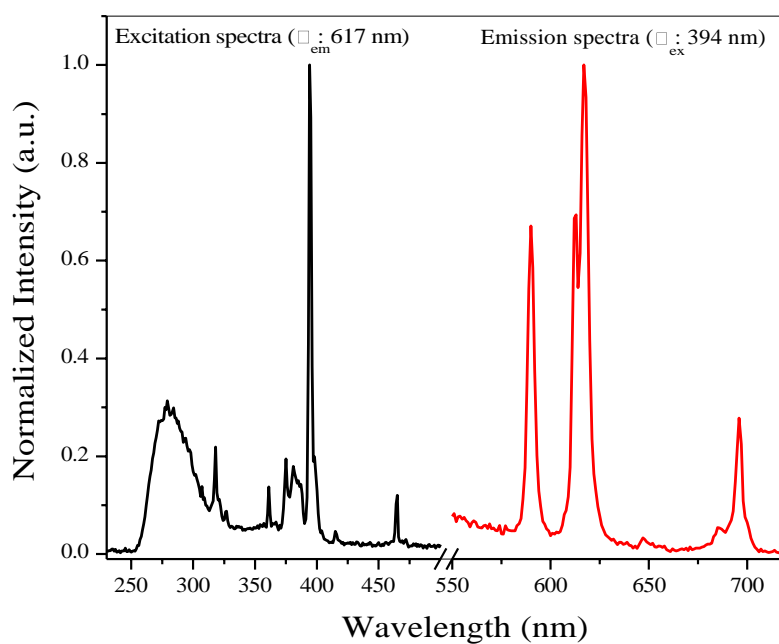

Fig. S3 Luminescence (excitation and emission) spectra of the Eu<sup>3+</sup> extract using 10 mM TEHDGA in 5% iso-decanol/n-dodecane ( $\lambda_{em}$ : 617 nm in the excitation scan and  $\lambda_{ex}$ : 394 nm in the emission scan).

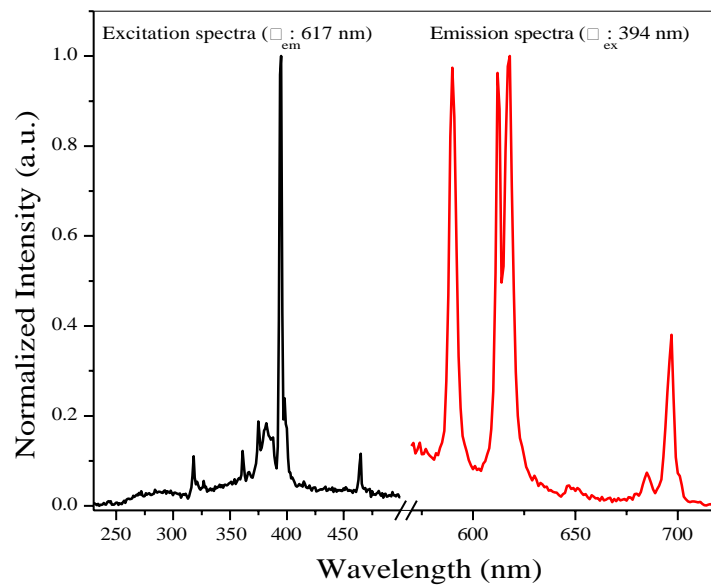

Fig. S4 Luminescence (excitation and emission) spectra of the Eu<sup>3+</sup> extract using 10 mM TODGA in 5% iso-decanol/n-dodecane (λ<sub>em</sub>: 617 nm in the excitation scan and λ<sub>ex</sub>: 394 nm in the emission scan).

### 3. DFT Studies

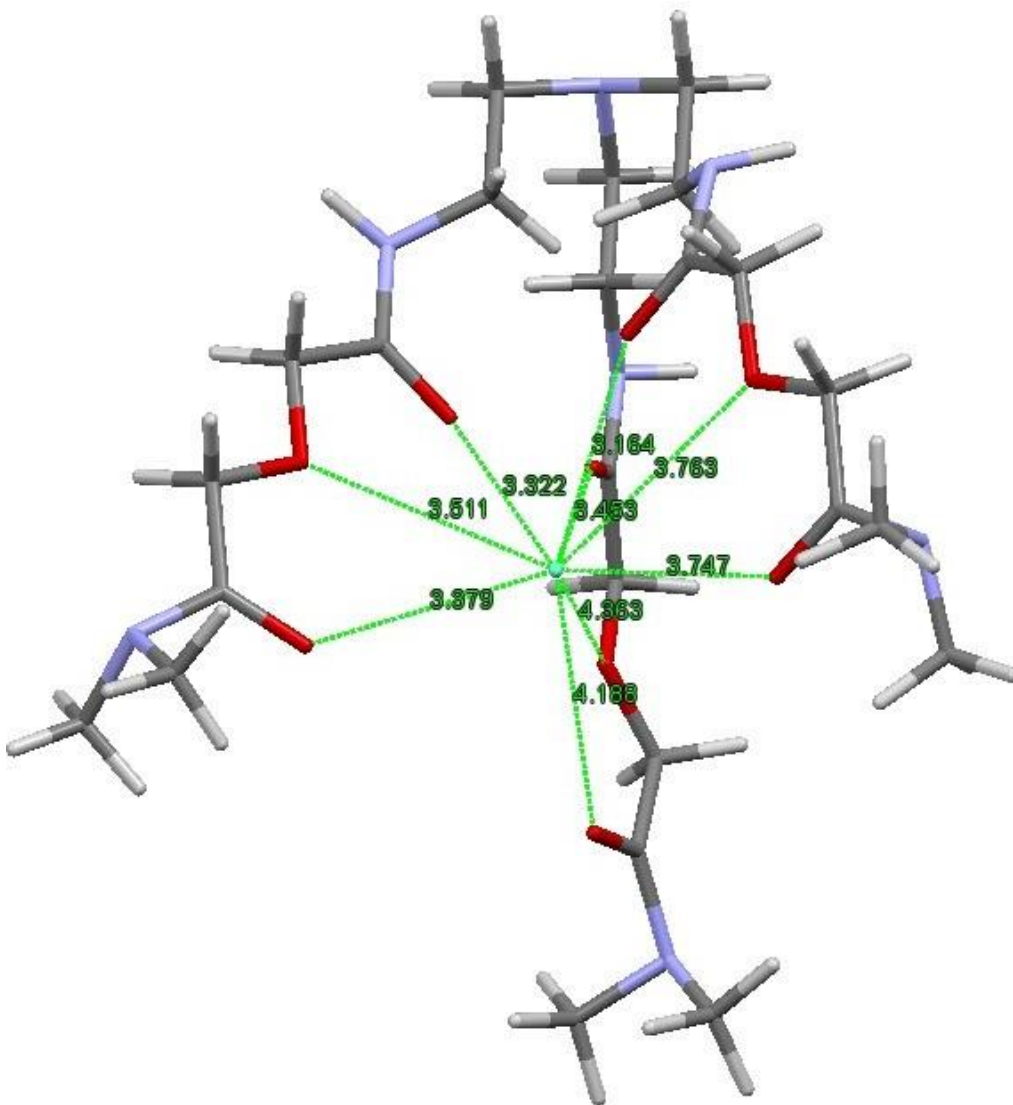

Fig.S5 Schematic 3D structure of the EuL<sup>3+</sup> type of complex of DGA-TREN with closest proximity of all the three DGA arms required for the similar nine-coordination environment as observed in case of the corresponding TODGA complex.

Table S2: Coordinates of the optimized geometries of free TREN-G1-DGA and its complexes with Am<sup>3+</sup> and Eu<sup>3+</sup>

Free TREN-G1-MDGA

|   |            |            |            |
|---|------------|------------|------------|
| N | 1.9551722  | 0.3987592  | -0.1668552 |
| C | 1.7444939  | 0.8372542  | -1.5562784 |
| H | 1.1906709  | 1.7985858  | -1.5530860 |
| H | 2.7231943  | 1.0478182  | -2.0650476 |
| C | 2.1258689  | 1.5491030  | 0.7372999  |
| H | 2.5829970  | 1.1935806  | 1.6857549  |
| H | 2.8380407  | 2.2908656  | 0.2903506  |
| C | 3.0822772  | -0.5477306 | -0.0556343 |
| H | 3.0895747  | -1.2155988 | -0.9429691 |
| H | 4.0555698  | 0.0147569  | -0.0767635 |
| C | 0.7764737  | 2.1982334  | 1.0888671  |
| H | 0.2496812  | 2.5032302  | 0.1430642  |
| H | 0.1392235  | 1.4102790  | 1.5494140  |
| C | 0.9024487  | -0.1584191 | -2.3741489 |
| H | 1.4069817  | -1.1531531 | -2.4118712 |
| H | -0.0454988 | -0.3159713 | -1.8165079 |
| C | 3.0736445  | -1.4486180 | 1.1939169  |
| H | 4.1147968  | -1.8068553 | 1.3387508  |
| H | 2.8226739  | -0.8233368 | 2.0948200  |
| N | 2.2544208  | -2.6504760 | 1.0801020  |
| N | 0.5656286  | 0.3520418  | -3.7066953 |
| N | 0.8642492  | 3.3097125  | 2.0452708  |
| C | 1.6016440  | 0.1864478  | -4.7244114 |
| H | 1.5122848  | 1.0031099  | -5.4804462 |
| H | 2.5882146  | 0.3324873  | -4.2357538 |
| C | -0.8084806 | 0.0895717  | -4.1280553 |
| H | -1.0035872 | -0.9846086 | -4.3911612 |
| H | -1.4738474 | 0.3190299  | -3.2669641 |
| C | 1.8615605  | 4.3340863  | 1.7365028  |
| H | 1.8628508  | 5.0916309  | 2.5510849  |
| H | 2.8692841  | 3.8679471  | 1.7589015  |
| C | -0.4523798 | 3.8034201  | 2.4300689  |
| H | -0.9334677 | 4.4502154  | 1.6380853  |
| H | -1.1212669 | 2.9221879  | 2.5426529  |
| C | 2.6298632  | -3.7370952 | 1.9684315  |
| H | 2.0666079  | -4.6529343 | 1.6735325  |
| H | 3.7050913  | -3.9683139 | 1.8018339  |
| C | 0.8513750  | -2.5290312 | 0.7300946  |
| H | 0.1588109  | -2.7492238 | 1.5903649  |
| H | 0.6588690  | -1.4784762 | 0.4192332  |
| C | 0.5347461  | -3.4712225 | -0.4521612 |

|   |             |            |            |
|---|-------------|------------|------------|
| H | 0.7080403   | -4.5337460 | -0.1571639 |
| H | 1.2412680   | -3.2560164 | -1.2761054 |
| C | -1.2707742  | 0.9754210  | -5.2979818 |
| H | -0.6784355  | 0.7594785  | -6.2184225 |
| H | -1.1314757  | 2.0487655  | -5.0544649 |
| C | -0.4675342  | 4.5602357  | 3.7736883  |
| H | 0.1814107   | 5.4656551  | 3.7357699  |
| H | -0.0867762  | 3.9027521  | 4.5813967  |
| C | 1.7183521   | 5.0662557  | 0.3722838  |
| H | 1.6970754   | 4.3204919  | -0.4514877 |
| H | 0.7768152   | 5.6540784  | 0.3223964  |
| C | 1.6453715   | -1.1478827 | -5.5145042 |
| H | 2.4697988   | -1.0719644 | -6.2560187 |
| H | 0.6947052   | -1.3049866 | -6.0696158 |
| C | 2.4036808   | -3.4870332 | 3.4859637  |
| H | 3.0025533   | -2.6141714 | 3.8193763  |
| H | 1.3320743   | -3.2745979 | 3.7001111  |
| N | -0.8194229  | -3.3109899 | -0.9785589 |
| H | -1.5803484  | -3.1454200 | -0.3129538 |
| N | 2.8341605   | -4.6181507 | 4.2930345  |
| H | 2.2673438   | -5.4728720 | 4.3387397  |
| N | 2.8327646   | 5.9652247  | 0.1154526  |
| H | 2.7838282   | 6.9603695  | 0.3627964  |
| N | -1.8160733  | 4.9518259  | 4.1571943  |
| H | -2.3470741  | 5.5480016  | 3.5171057  |
| N | -2.6841289  | 0.7726268  | -5.5796849 |
| H | -2.9986614  | -0.1952875 | -5.7743850 |
| N | 1.9002952   | -2.3345776 | -4.7108708 |
| H | 1.1090023   | -2.7871275 | -4.2245916 |
| C | -3.5708455  | 1.8052246  | -5.6213574 |
| O | -3.2826186  | 2.9940548  | -5.4580675 |
| C | -5.0236062  | 1.4065005  | -5.9491685 |
| H | -5.6146832  | 2.3505086  | -5.8880760 |
| H | -5.0899071  | 1.0220576  | -7.0015357 |
| O | -5.5287781  | 0.4339978  | -5.0379951 |
| C | -6.9180233  | 0.3064576  | -5.1517202 |
| H | -7.2139635  | -0.0740179 | -6.1694116 |
| H | -7.4161687  | 1.3046770  | -5.0384716 |
| C | -7.4460479  | -0.6585621 | -4.0727053 |
| O | -6.6829674  | -1.3225764 | -3.3702724 |
| N | -8.8209019  | -0.7329139 | -3.9438218 |
| C | -9.3803173  | -1.5188011 | -2.8517433 |
| H | -9.9406235  | -0.8662047 | -2.1419393 |
| H | -10.0792151 | -2.2968921 | -3.2374439 |
| H | -8.5428308  | -2.0061167 | -2.3158226 |
| C | -9.7686338  | 0.0532509  | -4.7198399 |

|   |             |            |            |
|---|-------------|------------|------------|
| H | -10.6851487 | -0.5521078 | -4.8971104 |
| H | -10.0762137 | 0.9899494  | -4.1936911 |
| H | -9.3585477  | 0.3248699  | -5.7122473 |
| C | 4.0087194   | 5.5205960  | -0.4124238 |
| O | 4.2479694   | 4.3563535  | -0.7380193 |
| C | 5.0723238   | 6.6168866  | -0.5865871 |
| H | 5.4014826   | 6.6148892  | -1.6560918 |
| H | 5.9609573   | 6.3273458  | 0.0307804  |
| O | 4.5527455   | 7.8701027  | -0.1933391 |
| C | 5.4950515   | 8.8968177  | -0.0691305 |
| H | 6.3267870   | 8.5934630  | 0.6211558  |
| H | 5.9665860   | 9.1394765  | -1.0577066 |
| C | 4.7602975   | 10.1375374 | 0.4899316  |
| O | 3.5599870   | 10.0909091 | 0.7429626  |
| N | 5.5272756   | 11.2730437 | 0.6811639  |
| C | 4.8722202   | 12.4853737 | 1.1504266  |
| H | 5.3350740   | 12.8424733 | 2.0997225  |
| H | 4.9542024   | 13.3005798 | 0.3931576  |
| H | 3.8038559   | 12.2511156 | 1.3246236  |
| C | 6.9403582   | 11.3957912 | 0.3687736  |
| H | 7.4807151   | 11.8626397 | 1.2248193  |
| H | 7.4059240   | 10.4096389 | 0.1809749  |
| H | 7.1109864   | 12.0388049 | -0.5289241 |
| C | -2.4253245  | 4.5005439  | 5.3073738  |
| O | -1.9019732  | 3.7360623  | 6.1069851  |
| C | -3.8157128  | 5.1191540  | 5.5573541  |
| H | -3.6778252  | 5.9377463  | 6.3144575  |
| H | -4.2300362  | 5.6020443  | 4.6305861  |
| O | -4.6779519  | 4.1224009  | 6.0392865  |
| C | -5.8768969  | 4.6437104  | 6.5380066  |
| H | -6.4263677  | 5.2325271  | 5.7523608  |
| H | -5.6799480  | 5.3528231  | 7.3859215  |
| C | -6.7632333  | 3.4711777  | 7.0157196  |
| O | -6.4258394  | 2.3075712  | 6.8375257  |
| N | -7.9492991  | 3.8226969  | 7.6466045  |
| C | -8.3807211  | 5.1807097  | 7.9253813  |
| H | -9.4724375  | 5.2775306  | 7.7224186  |
| H | -8.2097786  | 5.4671633  | 8.9927843  |
| H | -7.8618904  | 5.9163276  | 7.2805113  |
| C | -8.7838544  | 2.7623064  | 8.1902317  |
| H | -8.8481558  | 2.8323064  | 9.3023188  |
| H | -9.8176787  | 2.8196383  | 7.7763729  |
| H | -8.3252371  | 1.7932262  | 7.9112981  |
| C | -1.1132824  | -3.3884794 | -2.3073518 |
| C | -2.6156867  | -3.2955780 | -2.6307999 |
| H | -3.0566869  | -4.3127937 | -2.4401352 |



|   |            |             |            |
|---|------------|-------------|------------|
| H | -3.1317241 | -2.5881708  | -1.9294475 |
| O | -2.7882713 | -2.9173089  | -3.9692869 |
| C | -4.1258515 | -3.0689067  | -4.3832889 |
| H | -4.8277822 | -2.4374065  | -3.7789468 |
| H | -4.4399678 | -4.1381489  | -4.2639949 |
| C | -4.2553647 | -2.6288807  | -5.8472774 |
| O | -0.2691998 | -3.5793496  | -3.1882330 |
| O | -3.3901187 | -1.9353325  | -6.3923611 |
| N | -5.3923688 | -3.0313002  | -6.5179953 |
| C | -5.5333147 | -2.6939072  | -7.9266055 |
| H | -6.4281548 | -2.0494140  | -8.0951240 |
| H | -4.6229154 | -2.1489682  | -8.2430244 |
| H | -5.6471775 | -3.6170371  | -8.5417016 |
| C | -6.4846841 | -3.7941208  | -5.9352726 |
| H | -6.4378630 | -3.7933343  | -4.8311133 |
| H | -7.4557652 | -3.3264811  | -6.2185781 |
| H | -6.4965632 | -4.8491025  | -6.3021499 |
| C | 4.0791877  | -4.6800751  | 4.8494873  |
| O | 4.9139790  | -3.7754645  | 4.8399050  |
| C | 4.3959575  | -6.0178484  | 5.5376462  |
| H | 4.6545038  | -5.8021321  | 6.6058992  |
| H | 5.3170429  | -6.4357240  | 5.0571816  |
| O | 3.3051050  | -6.9093173  | 5.4334548  |
| C | 3.5186868  | -8.1592427  | 6.0222802  |
| H | 4.4152804  | -8.6653485  | 5.5738780  |
| H | 3.7228579  | -8.0592925  | 7.1216081  |
| C | 2.2519890  | -9.0149782  | 5.7920589  |
| O | 1.2949389  | -8.5650002  | 5.1697568  |
| N | 2.2707155  | -10.2949291 | 6.3215157  |
| C | 3.3521223  | -10.8588018 | 7.1105563  |
| H | 3.0949019  | -10.9052946 | 8.1974027  |
| H | 3.5680083  | -11.8982196 | 6.7705998  |
| H | 4.2862800  | -10.2753377 | 7.0003761  |
| C | 1.0792977  | -11.1202136 | 6.1904305  |
| H | 1.3225337  | -12.0867977 | 5.6907403  |
| H | 0.6362676  | -11.3450456 | 7.1898641  |
| H | 0.3425495  | -10.5617623 | 5.5803471  |
| C | 3.1659146  | -2.8082956  | -4.5220838 |
| O | 4.1758536  | -2.2895424  | -5.0204186 |
| C | 3.2710030  | -4.0382689  | -3.6028473 |
| H | 2.2682994  | -4.3960454  | -3.2880912 |
| H | 3.7866040  | -4.8538225  | -4.1728133 |
| O | 3.9746362  | -3.7438938  | -2.4048052 |
| C | 5.3645763  | -3.5828064  | -2.5723533 |
| H | 5.7920269  | -4.4605411  | -3.1287312 |
| H | 5.5903840  | -2.6828124  | -3.1904213 |

|   |           |            |            |
|---|-----------|------------|------------|
| C | 6.0209481 | -3.4914216 | -1.1817335 |
| O | 5.3646867 | -3.6159150 | -0.1496690 |
| N | 7.3901209 | -3.2717497 | -1.1662520 |
| C | 8.0663521 | -3.1635898 | 0.1170405  |
| H | 7.3251076 | -3.3594586 | 0.9163477  |
| H | 8.8970351 | -3.9049254 | 0.1873669  |
| H | 8.4972131 | -2.1436494 | 0.2582150  |
| C | 8.2231781 | -3.0589464 | -2.3368563 |
| H | 7.6675633 | -3.2415054 | -3.2754374 |
| H | 8.6167954 | -2.0138246 | -2.3686802 |
| H | 9.1003327 | -3.7486488 | -2.3194917 |

Am(TREN-G1-MDGA)<sup>3+</sup>

|   |           |            |            |
|---|-----------|------------|------------|
| N | 3.0819049 | -0.6171911 | -0.0670933 |
| C | 3.9677007 | -0.3593858 | -1.2135426 |
| H | 4.3740791 | 0.6692060  | -1.1249153 |
| H | 4.8633089 | -1.0321524 | -1.1776114 |
| C | 3.3402626 | 0.2537365  | 1.0845167  |
| H | 2.6812247 | -0.0729391 | 1.9167634  |
| H | 4.3964656 | 0.1520830  | 1.4537664  |
| C | 3.0057073 | -2.0372523 | 0.2639309  |
| H | 2.9318634 | -2.6088822 | -0.6859944 |
| H | 3.9391665 | -2.4006332 | 0.7752270  |
| C | 2.9881540 | 1.7276824  | 0.7665431  |
| H | 3.9071411 | 2.3326169  | 0.5519944  |
| H | 2.3915486 | 1.7039249  | -0.1699568 |
| C | 3.2950487 | -0.5285665 | -2.5903443 |
| H | 4.0829599 | -0.8103109 | -3.3403219 |
| H | 2.6084566 | -1.4011763 | -2.5303226 |
| C | 1.7561017 | -2.4150699 | 1.0991900  |
| H | 1.8948000 | -2.1331463 | 2.1751972  |
| H | 0.9186106 | -1.7928498 | 0.7111584  |
| N | 1.3928435 | -3.8201567 | 0.9695834  |
| N | 2.5164703 | 0.6278359  | -3.0785491 |
| N | 2.1754300 | 2.3801428  | 1.8055188  |
| C | 3.3953697 | 1.7224256  | -3.5211034 |
| H | 4.2289982 | 1.7866022  | -2.7918482 |
| H | 3.8754991 | 1.5087037  | -4.5136129 |
| C | 1.5636730 | 0.2016929  | -4.1166587 |
| H | 1.4407435 | 1.0195718  | -4.8580843 |
| H | 1.9627009 | -0.6669730 | -4.7017088 |
| C | 2.9687114 | 2.8023363  | 2.9768785  |
| H | 3.7517128 | 2.0317991  | 3.1397348  |
| H | 3.5111268 | 3.7609249  | 2.7738572  |
| C | 1.3454781 | 3.4576767  | 1.2494977  |

|   |            |            |            |
|---|------------|------------|------------|
| H | 0.9818454  | 4.0965154  | 2.0889935  |
| H | 1.9123633  | 4.1221372  | 0.5491235  |
| C | 2.0961219  | -4.7793450 | 1.8244127  |
| H | 3.0608115  | -4.3203801 | 2.1276519  |
| H | 1.5297808  | -4.9732536 | 2.7719890  |
| C | -0.0131101 | -4.1032380 | 0.7398929  |
| H | -0.1988705 | -5.1847453 | 0.9413947  |
| H | -0.6826115 | -3.5071815 | 1.4187006  |
| C | -0.3883142 | -3.8052150 | -0.7268836 |
| H | 0.2515854  | -4.4172986 | -1.3948928 |
| H | -0.2198283 | -2.7353848 | -0.9723523 |
| C | 0.1779102  | -0.1838865 | -3.5696020 |
| H | 0.2811235  | -0.7547596 | -2.6197314 |
| H | -0.3450369 | -0.8468095 | -4.2969891 |
| C | 0.1310460  | 2.8625396  | 0.5113465  |
| H | 0.4078293  | 2.3953670  | -0.4624975 |
| H | -0.6204076 | 3.6535034  | 0.3023845  |
| C | 2.1171975  | 2.9634393  | 4.2750644  |
| H | 1.0438397  | 2.8241494  | 4.0167477  |
| H | 2.3901797  | 2.1687313  | 5.0020787  |
| C | 2.7378686  | 3.1225851  | -3.5624486 |
| H | 3.5171467  | 3.8737199  | -3.3028562 |
| H | 1.9426178  | 3.1810681  | -2.7889394 |
| C | 2.3534148  | -6.1492903 | 1.1141395  |
| H | 1.8081122  | -6.1451221 | 0.1445837  |
| H | 3.4331839  | -6.2593323 | 0.8823041  |
| N | -1.7830192 | -4.1039872 | -1.0681858 |
| H | -1.9916690 | -5.0409514 | -1.4294762 |
| N | 1.9477164  | -7.3110644 | 1.8767172  |
| H | 2.6636694  | -7.9295594 | 2.3306724  |
| N | 2.2385136  | 4.2407482  | 4.9425690  |
| H | 3.0130539  | 4.4244625  | 5.6246969  |
| N | -0.4497175 | 1.8498628  | 1.3935398  |
| H | 0.2270133  | 1.5669052  | 2.1340317  |
| N | -0.6463800 | 1.0054855  | -3.3381588 |
| H | -0.2791660 | 1.9515062  | -3.6594720 |
| N | 2.1684036  | 3.5366425  | -4.8381120 |
| H | 2.8164431  | 3.8060037  | -5.6261342 |
| C | -1.8880366 | 0.9745950  | -2.8667213 |
| O | -2.4762449 | -0.0754399 | -2.4720462 |
| C | -2.6257532 | 2.3176913  | -2.8339934 |
| H | -1.9836869 | 3.0983212  | -2.3666156 |
| H | -2.8478771 | 2.6531919  | -3.8749923 |
| O | -3.8261814 | 2.1300551  | -2.0882162 |
| C | -4.4820897 | 3.3329730  | -1.7326785 |
| H | -5.0139570 | 3.7633881  | -2.6148449 |

|   |            |            |            |
|---|------------|------------|------------|
| H | -3.7396327 | 4.0908828  | -1.3804969 |
| C | -5.4607254 | 3.0085531  | -0.5928395 |
| O | -5.4477791 | 1.8536837  | -0.0929542 |
| N | -6.2932656 | 3.9746506  | -0.1552492 |
| C | -7.2441047 | 3.6950976  | 0.9242326  |
| H | -7.0019378 | 4.3147571  | 1.8162618  |
| H | -8.2739317 | 3.9475407  | 0.5888104  |
| H | -7.1893467 | 2.6232052  | 1.1890786  |
| C | -6.3247787 | 5.3442283  | -0.6734373 |
| H | -7.3029966 | 5.5494189  | -1.1631651 |
| H | -6.2000579 | 6.0622978  | 0.1668310  |
| H | -5.5165328 | 5.5316271  | -1.4045660 |
| C | 1.4310101  | 5.2859716  | 4.6337431  |
| O | 0.5482270  | 5.2614415  | 3.7603338  |
| C | 1.7041695  | 6.5629429  | 5.4495515  |
| H | 0.7624504  | 7.1586793  | 5.4389282  |
| H | 2.4864253  | 7.1557572  | 4.9146414  |
| O | 2.0864675  | 6.2585881  | 6.7792531  |
| C | 3.2078714  | 6.9158407  | 7.3140328  |
| H | 3.3003451  | 7.9588802  | 6.9231736  |
| H | 3.0360456  | 6.9916502  | 8.4111631  |
| C | 4.5138785  | 6.1174139  | 7.0526278  |
| O | 4.4749193  | 5.0706274  | 6.3823407  |
| N | 5.6728561  | 6.5936044  | 7.5920359  |
| C | 6.9103472  | 5.8361761  | 7.4197093  |
| H | 7.6776666  | 6.4590383  | 6.9065593  |
| H | 7.3144462  | 5.5247470  | 8.4098819  |
| H | 6.6917193  | 4.9386595  | 6.8106846  |
| C | 5.7811844  | 7.7931572  | 8.4159633  |
| H | 6.6118331  | 8.4329701  | 8.0419165  |
| H | 4.8544176  | 8.3961657  | 8.3926771  |
| H | 6.0030815  | 7.5298711  | 9.4766914  |
| C | -1.5882540 | 1.1993456  | 1.1676599  |
| O | -2.2978567 | 1.3834506  | 0.1447512  |
| C | -2.0548791 | 0.1999548  | 2.2344377  |
| H | -1.3547534 | -0.6693674 | 2.2963973  |
| H | -2.0870381 | 0.6954090  | 3.2336142  |
| O | -3.3552307 | -0.2269914 | 1.8458949  |
| C | -4.0518724 | -0.9682574 | 2.8328566  |
| H | -4.1797219 | -0.3525233 | 3.7549336  |
| H | -3.4834045 | -1.8910045 | 3.1127747  |
| C | -5.4114676 | -1.3471504 | 2.2255635  |
| O | -5.6012360 | -1.1429636 | 0.9993402  |
| N | -6.3477209 | -1.8870050 | 3.0314324  |
| C | -6.1483932 | -2.1560441 | 4.4586959  |
| H | -6.6369051 | -1.3748488 | 5.0843852  |

|   |            |             |            |
|---|------------|-------------|------------|
| H | -6.6065635 | -3.1367305  | 4.7083637  |
| H | -5.0750535 | -2.2147295  | 4.7213746  |
| C | -7.6818081 | -2.1956370  | 2.5088736  |
| H | -7.8578034 | -3.2942367  | 2.5253268  |
| H | -8.4514900 | -1.7060627  | 3.1447002  |
| H | -7.7632939 | -1.8185517  | 1.4726347  |
| C | -2.7897340 | -3.2312696  | -0.9179648 |
| C | -4.1678921 | -3.6522551  | -1.4424892 |
| H | -4.0727203 | -4.3066298  | -2.3412146 |
| H | -4.7235664 | -4.2217050  | -0.6560467 |
| O | -4.8442903 | -2.4465215  | -1.7705933 |
| C | -6.0636380 | -2.6298734  | -2.4717067 |
| H | -6.7827380 | -3.2306701  | -1.8616630 |
| H | -5.8791224 | -3.1796803  | -3.4260090 |
| C | -6.6280022 | -1.2275030  | -2.7479055 |
| O | -2.6491089 | -2.0966592  | -0.4030208 |
| O | -6.0358778 | -0.2356018  | -2.2546574 |
| N | -7.7363843 | -1.1186208  | -3.5077364 |
| C | -8.2836744 | 0.2023803   | -3.8281915 |
| H | -9.3167192 | 0.2934271   | -3.4257178 |
| H | -7.6390093 | 0.9800368   | -3.3794679 |
| H | -8.3198978 | 0.3364684   | -4.9317713 |
| C | -8.4370531 | -2.2539206  | -4.1131456 |
| H | -8.1557528 | -3.2144912  | -3.6410939 |
| H | -9.5316800 | -2.1205659  | -3.9771452 |
| H | -8.2272405 | -2.3118094  | -5.2054291 |
| C | 0.6722843  | -7.7658806  | 1.8517537  |
| O | -0.2648251 | -7.2171622  | 1.2444276  |
| C | 0.4484307  | -9.0835791  | 2.6173350  |
| H | 0.5898779  | -9.9267142  | 1.8974686  |
| H | -0.6186262 | -9.0933896  | 2.9395125  |
| O | 1.3053414  | -9.1950078  | 3.7395732  |
| C | 2.0306737  | -10.3884922 | 3.9074214  |
| H | 2.1481536  | -10.5376999 | 5.0044361  |
| H | 1.4686586  | -11.2698828 | 3.5131762  |
| C | 3.4356757  | -10.2970279 | 3.2501339  |
| O | 3.7658130  | -9.2636488  | 2.6427512  |
| N | 4.2756815  | -11.3638052 | 3.3815144  |
| C | 3.9621045  | -12.5956902 | 4.0971119  |
| H | 4.0857870  | -13.4737375 | 3.4227887  |
| H | 4.6505010  | -12.7302880 | 4.9631507  |
| H | 2.9239933  | -12.6011163 | 4.4781488  |
| C | 5.6172775  | -11.2980832 | 2.8047673  |
| H | 6.3872080  | -11.3978601 | 3.6033536  |
| H | 5.7626934  | -12.1230589 | 2.0710794  |
| H | 5.7352438  | -10.3226739 | 2.2962603  |

|    |            |            |             |
|----|------------|------------|-------------|
| C  | 0.8658057  | 3.7653833  | -5.0701265  |
| O  | -0.0767957 | 3.4487129  | -4.3009681  |
| C  | 0.5713508  | 4.4555672  | -6.4127555  |
| H  | 0.5615433  | 3.6762590  | -7.2148803  |
| H  | -0.4570706 | 4.8800788  | -6.3383149  |
| O  | 1.5185349  | 5.4731852  | -6.6682666  |
| C  | 2.0735883  | 5.5528424  | -7.9602462  |
| H  | 1.3141732  | 5.3354511  | -8.7504395  |
| H  | 2.3914828  | 6.6105530  | -8.0932693  |
| C  | 3.3015023  | 4.6145633  | -8.1040204  |
| O  | 3.6186366  | 3.8707144  | -7.1557282  |
| N  | 4.0025722  | 4.6454967  | -9.2703978  |
| C  | 5.1914165  | 3.8075072  | -9.4217361  |
| H  | 5.3342210  | 3.2240414  | -8.4929482  |
| H  | 5.0674399  | 3.1152547  | -10.2847193 |
| H  | 6.0881708  | 4.4415547  | -9.6049826  |
| C  | 3.6969023  | 5.5092807  | -10.4073889 |
| H  | 2.7493810  | 6.0619119  | -10.2654349 |
| H  | 4.5134654  | 6.2505165  | -10.5669521 |
| H  | 3.6024169  | 4.8989565  | -11.3338308 |
| Am | -4.1062055 | -0.0933691 | -0.6960982  |

Eu(TREN-G1-MDGA)<sup>3+</sup>

|   |           |            |            |
|---|-----------|------------|------------|
| N | 4.0206785 | -0.0384972 | 0.2723740  |
| C | 4.4589272 | 0.2392507  | -1.1041272 |
| H | 4.1083363 | 1.2520578  | -1.3776898 |
| H | 5.5813264 | 0.2671774  | -1.1806881 |
| C | 4.2997135 | 1.0845408  | 1.1785150  |
| H | 3.9705910 | 0.7818926  | 2.1957167  |
| H | 5.4039479 | 1.2824502  | 1.2502807  |
| C | 4.6094343 | -1.2824288 | 0.7931492  |
| H | 4.5811301 | -2.0431909 | -0.0153518 |
| H | 5.6913517 | -1.1302666 | 1.0490961  |
| C | 3.5477098 | 2.3983316  | 0.8044792  |
| H | 4.2420994 | 3.0955308  | 0.2744265  |
| H | 2.7461569 | 2.1402214  | 0.0799002  |
| C | 3.8642195 | -0.7598441 | -2.1479593 |
| H | 4.6543859 | -1.4707494 | -2.4904749 |
| H | 3.0889751 | -1.3642864 | -1.6262172 |
| C | 3.8420415 | -1.8726149 | 2.0183319  |
| H | 4.5669811 | -2.0842678 | 2.8432848  |
| H | 3.1488008 | -1.0953060 | 2.4036545  |
| N | 3.0539849 | -3.0572195 | 1.7210273  |

|   |            |            |            |
|---|------------|------------|------------|
| N | 3.2314114  | -0.1363954 | -3.2973370 |
| N | 2.9119413  | 3.0776208  | 1.9188041  |
| C | 4.0419064  | 0.4043569  | -4.3748994 |
| H | 5.1053174  | 0.2687805  | -4.0834226 |
| H | 3.8995577  | -0.1755851 | -5.3218413 |
| C | 1.7939300  | -0.2033939 | -3.4348790 |
| H | 1.5309971  | 0.1469572  | -4.4537157 |
| H | 1.4214182  | -1.2568690 | -3.3511558 |
| C | 3.7117045  | 3.7163006  | 2.9493295  |
| H | 4.7770530  | 3.6010784  | 2.6534581  |
| H | 3.5113396  | 4.8156505  | 2.9838971  |
| C | 1.4736355  | 3.2134517  | 1.9315804  |
| H | 1.1941495  | 3.8136056  | 2.8209239  |
| H | 1.1052785  | 3.7769462  | 1.0362293  |
| C | 3.7412643  | -4.3345417 | 1.5894275  |
| H | 4.8200130  | -4.1141061 | 1.4476340  |
| H | 3.6676208  | -4.9428668 | 2.5279972  |
| C | 1.6390517  | -3.0577142 | 2.0184927  |
| H | 1.3024439  | -4.1122245 | 2.0665974  |
| H | 1.4176433  | -2.6102716 | 3.0206866  |
| C | 0.8173859  | -2.3256687 | 0.9200634  |
| H | 1.4626426  | -2.2553987 | 0.0180266  |
| H | 0.5256401  | -1.3008596 | 1.2257513  |
| C | 1.0465453  | 0.6845562  | -2.3940622 |
| H | 1.7196337  | 1.5233959  | -2.1214747 |
| H | 0.7953418  | 0.1126889  | -1.4776757 |
| C | 0.7449589  | 1.8403503  | 2.0044625  |
| H | 1.3944007  | 1.1370099  | 2.5638797  |
| H | 0.5469478  | 1.4298233  | 0.9942315  |
| C | 3.5421061  | 3.1559999  | 4.4029264  |
| H | 3.2863071  | 2.0756575  | 4.3599181  |
| H | 4.5203854  | 3.2540836  | 4.9232508  |
| C | 3.8232404  | 1.9173240  | -4.7024755 |
| H | 4.7906381  | 2.3275235  | -5.0672798 |
| H | 3.5456597  | 2.4678158  | -3.7784084 |
| C | 3.2740716  | -5.2262598 | 0.3996053  |
| H | 2.9335541  | -4.5827727 | -0.4395481 |
| H | 4.1487410  | -5.8156613 | 0.0479205  |
| N | -0.3850381 | -3.0474860 | 0.5241668  |
| H | -0.1711051 | -3.9727307 | 0.0799741  |
| N | 2.2239805  | -6.1844345 | 0.7136095  |
| H | 2.5140457  | -7.1319828 | 1.0767781  |
| N | 2.5630329  | 3.8439616  | 5.2305159  |
| H | 2.8865946  | 4.6775210  | 5.7918615  |
| N | -0.5173796 | 1.8978635  | 2.7258438  |
| H | -0.3825648 | 1.9611035  | 3.7582538  |

|   |            |           |            |
|---|------------|-----------|------------|
| N | -0.1751600 | 1.2901486 | -2.9068903 |
| H | 0.0178400  | 2.0753255 | -3.5686350 |
| N | 2.8369961  | 2.1963835 | -5.7342682 |
| H | 3.1648902  | 2.2112180 | -6.7366356 |
| C | -1.4120258 | 0.9577648 | -2.5215766 |
| O | -1.6782592 | 0.0663470 | -1.6793048 |
| C | -2.5636462 | 1.7637929 | -3.1301896 |
| H | -2.2274076 | 2.7768468 | -3.4523149 |
| H | -2.9803997 | 1.2301589 | -4.0219858 |
| O | -3.5412920 | 1.8583874 | -2.0965022 |
| C | -4.6549309 | 2.6670604 | -2.4097787 |
| H | -5.2164423 | 2.2506175 | -3.2838214 |
| H | -4.3221210 | 3.6987193 | -2.6803997 |
| C | -5.5514892 | 2.6945671 | -1.1604731 |
| O | -5.2401672 | 1.9835970 | -0.1772337 |
| N | -6.6440362 | 3.4921459 | -1.1746913 |
| C | -7.5043476 | 3.5772481 | 0.0055501  |
| H | -7.5429830 | 4.6271761 | 0.3730906  |
| H | -8.5385509 | 3.2545644 | -0.2491068 |
| H | -7.0937865 | 2.9226018 | 0.7964918  |
| C | -7.0334765 | 4.3498914 | -2.2947053 |
| H | -8.1075722 | 4.1852229 | -2.5320608 |
| H | -6.8960802 | 5.4244749 | -2.0339026 |
| H | -6.4475537 | 4.1316342 | -3.2072726 |
| C | 1.3340514  | 3.3813756 | 5.5434961  |
| O | 0.8210502  | 2.3332641 | 5.0970772  |
| C | 0.5898520  | 4.2389912 | 6.5858155  |
| H | 0.8828448  | 3.8666444 | 7.5983673  |
| H | -0.4993868 | 4.0393068 | 6.4590382  |
| O | 0.8670699  | 5.6179363 | 6.4239935  |
| C | 1.2069875  | 6.3624079 | 7.5731364  |
| H | 0.8731048  | 7.4079405 | 7.3773606  |
| H | 0.6545439  | 6.0027535 | 8.4743482  |
| C | 2.7408318  | 6.3455376 | 7.8171866  |
| O | 3.4754569  | 5.6909112 | 7.0555379  |
| N | 3.2351485  | 7.0714970 | 8.8579287  |
| C | 4.6742583  | 7.0737355 | 9.1170449  |
| H | 5.0779202  | 8.1101703 | 9.0521501  |
| H | 4.8836872  | 6.6726364 | 10.1355373 |
| H | 5.1704003  | 6.4353237 | 8.3632493  |
| C | 2.4251882  | 7.8404971 | 9.7972474  |
| H | 2.8424865  | 8.8646601 | 9.9052999  |
| H | 1.3762747  | 7.9422715 | 9.4573816  |
| H | 2.4278436  | 7.3624084 | 10.8044072 |
| C | -1.7172578 | 1.7925371 | 2.1505122  |
| O | -1.8968180 | 1.6301629 | 0.9203654  |



|   |            |            |            |
|---|------------|------------|------------|
| C | -2.9412166 | 1.8222182  | 3.0702944  |
| H | -2.6880999 | 1.4906366  | 4.1043139  |
| H | -3.3535238 | 2.8610669  | 3.1263651  |
| O | -3.8874220 | 0.9427530  | 2.4683351  |
| C | -5.0861121 | 0.7498097  | 3.1857079  |
| H | -5.6935827 | 1.6904949  | 3.2016775  |
| H | -4.8671172 | 0.4719837  | 4.2439209  |
| C | -5.8545048 | -0.3757452 | 2.4716952  |
| O | -5.4050815 | -0.8306308 | 1.3951223  |
| N | -6.9940332 | -0.8302545 | 3.0447091  |
| C | -7.5174161 | -0.3496984 | 4.3248777  |
| H | -8.6238712 | -0.3321489 | 4.2769865  |
| H | -7.2176148 | -1.0171804 | 5.1625589  |
| H | -7.1815059 | 0.6831364  | 4.5450175  |
| C | -7.7277957 | -1.9389470 | 2.4338961  |
| H | -7.7969562 | -2.7899667 | 3.1492623  |
| H | -8.7582562 | -1.6171501 | 2.1631318  |
| H | -7.1895092 | -2.2661952 | 1.5263163  |
| C | -1.6197018 | -2.5399569 | 0.5520309  |
| C | -2.7393658 | -3.4190337 | -0.0178088 |
| H | -2.3455342 | -4.1463927 | -0.7681561 |
| H | -3.2305612 | -3.9929455 | 0.8044836  |
| O | -3.6599789 | -2.5137129 | -0.6211656 |
| C | -4.7591067 | -3.1172738 | -1.2708880 |
| H | -5.4052368 | -3.6569702 | -0.5341249 |
| H | -4.4071681 | -3.8648703 | -2.0219899 |
| C | -5.5488261 | -1.9858845 | -1.9559376 |
| O | -1.9140778 | -1.3983384 | 0.9768744  |
| O | -5.1885156 | -0.8003487 | -1.7746161 |
| N | -6.6052658 | -2.3275640 | -2.7333566 |
| C | -7.3604243 | -1.2923128 | -3.4374890 |
| H | -8.4241035 | -1.3024785 | -3.1080674 |
| H | -6.9130501 | -0.3084525 | -3.2052615 |
| H | -7.3291653 | -1.4696265 | -4.5352626 |
| C | -7.0412998 | -3.7003223 | -2.9850910 |
| H | -8.1426613 | -3.7684803 | -2.8532956 |
| H | -6.7985550 | -4.0084975 | -4.0269514 |
| H | -6.5744936 | -4.4174449 | -2.2857160 |
| C | 0.9361488  | -6.0799829 | 0.3312073  |
| O | 0.4281177  | -5.0879169 | -0.2410438 |
| C | 0.0915427  | -7.3407280 | 0.6097044  |
| H | 0.1651907  | -7.9953049 | -0.2933123 |
| H | -0.9717370 | -7.0119832 | 0.6936529  |
| O | 0.4989455  | -8.0067229 | 1.7882831  |
| C | 0.7247360  | -9.3984715 | 1.7308167  |
| H | 0.4556554  | -9.8012290 | 2.7332927  |

|    |            |             |             |
|----|------------|-------------|-------------|
| H  | 0.0522236  | -9.8900645  | 0.9853017   |
| C  | 2.2143556  | -9.7154311  | 1.4268664   |
| O  | 3.0124773  | -8.7809214  | 1.2323054   |
| N  | 2.6061467  | -11.0202242 | 1.4074815   |
| C  | 1.7354345  | -12.1554012 | 1.6933403   |
| H  | 0.6682021  | -11.8676727 | 1.7241151   |
| H  | 1.8589289  | -12.9272866 | 0.9013435   |
| H  | 2.0041977  | -12.6272232 | 2.6710531   |
| C  | 4.0113899  | -11.3448738 | 1.1748718   |
| H  | 4.4410812  | -11.8616375 | 2.0640980   |
| H  | 4.1104237  | -12.0172069 | 0.2922368   |
| H  | 4.5659732  | -10.4049810 | 0.9909047   |
| C  | 1.6002069  | 2.6862080   | -5.5192196  |
| O  | 1.0760470  | 2.8585176   | -4.3964179  |
| C  | 0.8560935  | 3.0967774   | -6.8055262  |
| H  | -0.2370255 | 3.0235849   | -6.5909399  |
| H  | 1.0854089  | 4.1742212   | -6.9958002  |
| O  | 1.2015288  | 2.2765485   | -7.9045781  |
| C  | 1.5367353  | 2.9012016   | -9.1258689  |
| H  | 1.2092282  | 2.2096024   | -9.9340748  |
| H  | 0.9772835  | 3.8574202   | -9.2658188  |
| C  | 3.0665168  | 3.1408172   | -9.2348614  |
| O  | 3.8034262  | 2.8439301   | -8.2769299  |
| N  | 3.5556915  | 3.6565163   | -10.3955733 |
| C  | 4.9993521  | 3.8398965   | -10.5478048 |
| H  | 5.4950421  | 3.5370382   | -9.6068994  |
| H  | 5.3812920  | 3.2155846   | -11.3869855 |
| H  | 5.2311566  | 4.9056686   | -10.7672887 |
| C  | 2.7518270  | 3.9798431   | -11.5705651 |
| H  | 1.6697846  | 3.9982962   | -11.3392772 |
| H  | 3.0328428  | 4.9872096   | -11.9491612 |
| H  | 2.9261187  | 3.2444489   | -12.3903470 |
| Eu | -3.5590529 | 0.1028086   | -0.0644949  |
